# Supplementary material
Source: PubMed Central journal article supplement (PMC5503809)
Supplement: NIHMS843519-supplement-1.pdf [file NIHMS843519-supplement-1.pdf]

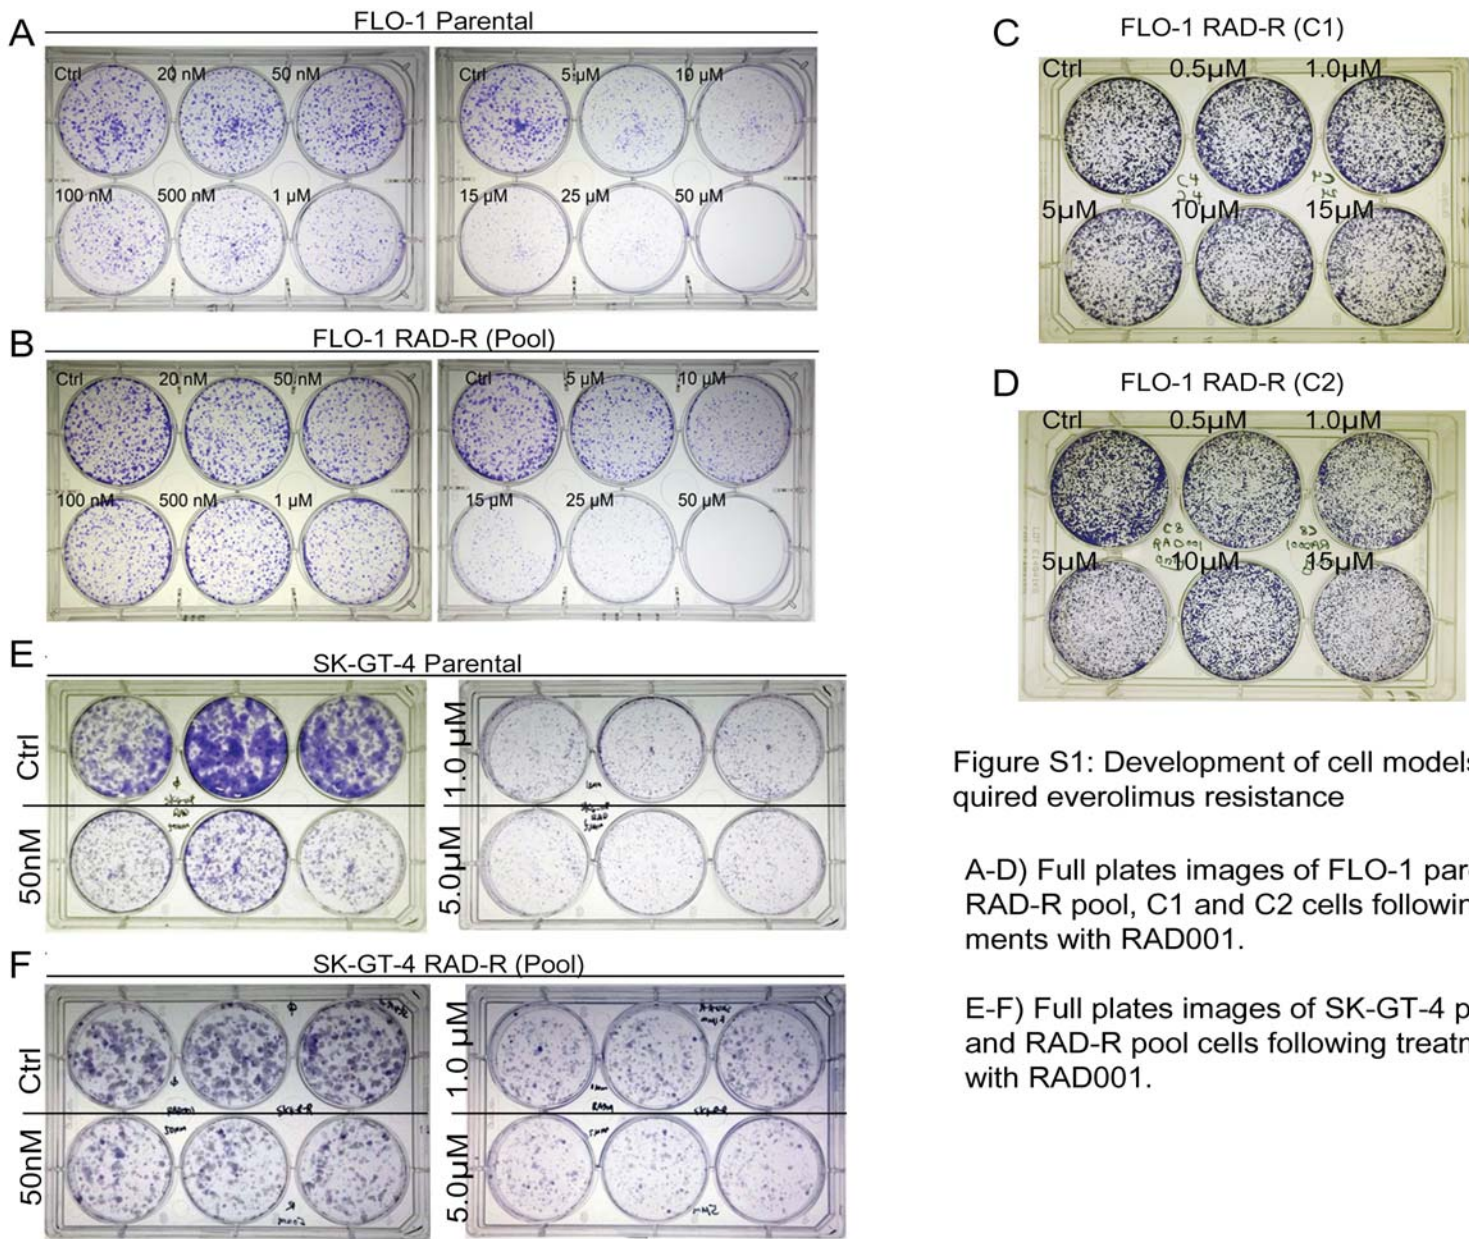

Figure S1: Development of cell models of acquired everolimus resistance

A-D) Full plates images of FLO-1 parental, RAD-R pool, C1 and C2 cells following treatments with RAD001.

E-F) Full plates images of SK-GT-4 parental and RAD-R pool cells following treatment with RAD001.

Figure S1. Katsha et al
