# Supplementary material
Source: PubMed Central journal article supplement (PMC5503809)
Supplement: NIHMS843519-supplement-7.pdf [file NIHMS843519-supplement-7.pdf]

**Supplementary Table 1: The sequence of the oligos used in RT-PCR**

| <b>Gene</b>  | <b>Forward primer</b> | <b>Reverse Primer</b>   | <b>species</b> |
|--------------|-----------------------|-------------------------|----------------|
| <i>AURKA</i> | GCTGGAGAGCTTAAAATTGCA | TTTTGTAGGTCTCTTGGTATGTG | Human          |
| <i>c-MYC</i> | CACCGAGTCGTAGTCGAGGT  | TTTCGGGTAGTGGAAAACCA    | Human          |
| <i>eIF4E</i> | CTAAGATGGCGACTGTCGAA  | TCTGGGTTAGCAACCTCCTG    | Human          |
| <i>4EBP1</i> | CCCTCGGTGTCCTACTTCAA  | CACTTCTGTTCCCTCGCAGAC   | Human          |
| <i>18S</i>   | TTGACGGAAGGGCACCACCAG | GCACCACCACCCACGGAATCG   | Human          |
